# Supplementary material for: Common Oncogene Mutations and Novel SND1-BRAF Transcript Fusion in Lung Adenocarcinoma from Never Smokers
Source: PubMed Central journal article supplement (PMC4434945; doi:10.1038/srep09755), 2015-05-18
Supplement: srep09755-s1.pdf [file srep09755-s1.pdf]

## **Common Oncogene Mutations and Novel *SND1-BRAF* Transcript Fusion in Lung Adenocarcinoma from Never Smokers**

\*Jin Sung Jang<sup>1</sup>, \* Adam Lee<sup>2</sup>, Jun Li<sup>1,3</sup>, Hema Liyanage<sup>4</sup>, Yanan Yang<sup>1</sup>, Lixia Guo<sup>1</sup>, Yan W. Asmann<sup>5</sup>, Peter W. Li<sup>5</sup>, Michele Erickson-Johnson<sup>6</sup>, Yuta Sakai<sup>6</sup>, ZhiFu Sun<sup>5</sup>, Hyo-Sung Jeon<sup>7</sup>, Hayoung Hwang<sup>8</sup>, Aaron O. Bungum<sup>1</sup>, Eric S. Edell<sup>1</sup>, Vernadette A. Simon<sup>9</sup>, Karla J. Kopp<sup>10</sup>, Bruce Eckloff<sup>11</sup>, Andre M. Oliveira<sup>6</sup>, Eric Wieben<sup>11</sup>, Marie Christine Aubry<sup>6</sup>, Eunhee Yi<sup>6</sup>, Dennis Wigle<sup>12</sup>, Robert B. Diasio<sup>2</sup>, Ping Yang<sup>5</sup>, and Jin Jen<sup>1,6,9</sup>

<sup>1</sup>Departments of Medicine, Division of Pulmonary and Critical Care

Medicine, <sup>2</sup>Molecular Pharmacology and Experimental Therapeutics, <sup>5</sup>Health Science

Research, <sup>6</sup>Laboratory Medicine and Pathology, and <sup>12</sup>Thoracic Surgery; <sup>9</sup>Gene

Expression Core, <sup>10</sup>Biospecimen Accessioning and Processing Core, and <sup>11</sup>DNA

Sequencing Core, Mayo Clinic, Rochester, MN, <sup>3</sup>Department of Oncology and

Hematology, China-Japan Union Hospital of Jilin University, Jilin, China, <sup>4</sup>Sequenom,

Inc., San Diego, CA, USA, <sup>7</sup>Department of Biochemistry and Cell Biology, School of

Medicine, Kyungpook National University, Daegu, and <sup>8</sup>New Drug Development Center,

Daegu-Gyeongbuk Medical Innovation Foundation, Daegu, Korea.

**Correspondence to:** Jin Jen, MD, PhD, Stabile Research Building, Mayo Clinic, 200 First St SW, Rochester, MN 55905 ([jen.jin@mayo.edu](mailto:jen.jin@mayo.edu)).

**Funding:** Supported by funding from the American Cancer Society, the Mayo Clinic Cancer Center, and the Mayo Center for Individualized Medicine.

**Competing Interests:** HL is an employee of Sequenom. All other authors have no competing interests exist.

\* These authors contributed equally to this work

Supplementary Table S1. Number of detectable mutations for genes examined by OncoCarta™ and Custom Mass Array Panel.

| Gene                   | <sup>a</sup> OncoCarta™ | Custom Mass Array |
|------------------------|-------------------------|-------------------|
| <i>EGFR</i>            | 53                      | 63                |
| <i>BRAF</i>            | 24                      | 47                |
| <i>MET<sup>b</sup></i> | 5                       | 21                |
| <i>PIK3CA</i>          | 14                      | 17                |
| <i>K-RAS</i>           | 17                      | 15                |
| <i>ERBB2</i>           | 8                       | 11                |
| <i>AKT1</i>            | 7                       | 7                 |
| <i>AKT2</i>            | 2                       | 2                 |
| <i>KIT</i>             | 33                      | 3                 |
| <i>JAK</i>             | 1                       | 1                 |
| Total                  | 164                     | 187               |

<sup>a</sup> Only genes shared with Custom Mass Array are shown.

<sup>b</sup> Included germ line changes.

Supplementary Table S2. Mutation profiling of NS lung cancer.

| Sample  | EGFR_Exon | EGFR_1              | EGFR_2 | BRAF  | ERBB2            | KRAS | MET <sup>3</sup> | PIK3CA | Fusion Gene |
|---------|-----------|---------------------|--------|-------|------------------|------|------------------|--------|-------------|
| Lu-0005 |           |                     |        |       | M774_A775insAYVM |      |                  |        | SND1-BRAF   |
| Lu-0106 | 20        | V769_D770insASV     |        |       |                  |      |                  |        |             |
| Lu-0124 | 19        | E746_S752A          |        |       |                  |      |                  |        |             |
| Lu-0132 | 19        | L747_S752del        |        |       |                  |      |                  |        |             |
| Lu-0161 |           |                     |        |       |                  | G12V |                  |        |             |
| Lu-0243 | 21, 20    | L858R               | S768I  |       |                  |      |                  |        |             |
| Lu-0246 | 20        | H773_V774insNPH     | S768I  |       |                  |      |                  |        | SND1-BRAF   |
| Lu-0253 | 18        | G719A <sup>1</sup>  |        |       |                  |      |                  |        |             |
| Lu-0346 | 19        | E746_S752A          |        |       |                  |      |                  |        |             |
| Lu-0389 | 19        | E746_S752A          |        |       |                  |      |                  |        |             |
| Lu-0426 | 21        | L858R               |        |       |                  |      |                  |        |             |
| Lu-0443 | 21        | L858R               |        |       |                  |      |                  |        |             |
| Lu-0465 |           |                     |        |       |                  |      | N375S            |        |             |
| Lu-0516 | 19        | E746_A750del        |        |       |                  |      |                  |        |             |
| Lu-0587 | 19        | L747_S752del        |        |       |                  |      |                  |        |             |
| Lu-0593 |           |                     |        | V600E |                  |      |                  |        |             |
| Lu-0597 |           |                     |        |       |                  |      |                  |        | ALK+        |
| Lu-0733 | 21        | L858R               |        |       |                  |      |                  |        |             |
| Lu-0757 |           |                     |        |       | G776VC           |      |                  |        |             |
| Lu-0760 | 21        | L858R               |        |       |                  |      |                  |        |             |
| Lu-0789 |           |                     |        |       |                  |      |                  |        | ALK+        |
| Lu-0824 | 19        | E746_A750del        |        |       |                  |      | T1010I           |        |             |
| Lu-0891 | 21        | L747_S752del        |        |       |                  |      |                  |        | ALK+        |
| Lu-0905 | 21        | L858R               |        |       |                  |      |                  |        |             |
| Lu-0920 | 19        | E746_A750del        |        |       |                  |      |                  |        |             |
| Lu-1014 | 19        | E746_S752A          |        |       |                  |      |                  |        |             |
| Lu-1015 |           |                     |        | G469V |                  |      |                  |        |             |
| Lu-1031 |           |                     |        |       | G776VC           |      |                  |        |             |
| Lu-1033 | 19        | E746_T751del, V ins |        |       |                  |      |                  |        |             |
| Lu-1068 | 21        | L858R               |        |       |                  |      | R988C            |        |             |
| Lu-1096 | 21        | L858R               |        |       |                  |      |                  | H1047R |             |

|         |    |                     |                  |      |        |           |
|---------|----|---------------------|------------------|------|--------|-----------|
| Lu-1155 | 19 | E746_A750del        |                  |      |        |           |
| Lu-1222 | 21 | L858R               |                  |      |        |           |
| Lu-1271 | 19 | E746_A751del        |                  |      | E168D  |           |
| Lu-1286 | 19 | E746_A750del        |                  |      |        |           |
| Lu-1321 | 19 | E746_S752A          |                  |      |        |           |
| Lu-1333 | 19 | E746_A750del        |                  |      |        |           |
| Lu-1377 | 19 | H773_V774insPH      |                  |      |        |           |
| Lu-1437 | 19 | E746_A750del        |                  |      |        |           |
| Lu-1450 |    |                     |                  | Q61H |        |           |
| Lu-1479 | 19 | E746_T751del, V ins |                  |      | T1010I |           |
| Lu-1518 | 19 | E746_A750del        |                  |      |        |           |
| Lu-1547 | 21 | L858R               |                  |      |        |           |
| Lu-1566 |    |                     |                  |      |        | EZR-ROS   |
| Lu-1606 | 21 | L858R               |                  |      |        |           |
| Lu-1632 | 21 | L858R               |                  |      |        |           |
| Lu-1659 | 19 | E746_A750del        |                  |      |        |           |
| Lu-1660 |    |                     | V600E            |      | T1010I |           |
| Lu-1682 |    |                     |                  | G12D |        |           |
| Lu-1683 | 19 | E746_A750del        |                  |      | E168D  |           |
| Lu-1686 |    |                     |                  | G12A |        |           |
| Lu-1789 |    |                     |                  |      | R988C  | ALK+      |
| Lu-1790 |    |                     | K601E            |      |        |           |
| Lu-1806 | 21 | L858R               |                  |      |        |           |
| Lu-1848 |    |                     |                  | G12D |        |           |
| Lu-1875 | 20 | S768I <sup>2</sup>  |                  |      | E542K  | SND1-BRAF |
| Lu-1908 | 19 | E746_A750del        |                  |      |        |           |
| Lu-1939 | 19 | E746_A750del        |                  |      | E545K  |           |
| Lu-1942 | 21 | L858R               |                  |      |        |           |
| Lu-1943 | 19 | E746_S752A          |                  |      |        |           |
| Lu-1995 |    |                     |                  |      |        | KIF5B-RET |
| Lu-2029 | 19 | E746_A750del        |                  |      |        |           |
| Lu-2040 |    |                     | M774_A775insAYVM |      |        |           |
| Lu-2070 | 20 | T790M               |                  |      |        |           |

|         |    |              |   |   |   |       |   |   |  |
|---------|----|--------------|---|---|---|-------|---|---|--|
| Lu-2172 | 19 | E746_S752A   |   |   |   |       |   |   |  |
| Lu-2196 | 21 | L858R        |   |   |   | N375S |   |   |  |
| Lu-2456 | 21 | L858R        |   |   |   |       |   |   |  |
| Lu-2502 | 19 | E746_A750del |   |   |   |       |   |   |  |
| Total   | 68 | 49           | 4 | 4 | 5 | 9     | 3 | 9 |  |

<sup>1</sup> OncoCarta™ detected. <sup>2</sup> LuCaMSP detected. <sup>3</sup> Germ line changes. ALK\* were described based on as previous result (12).

Supplementary Table S3. Fusion gene profiling of NS lung cancer by RNA-Seq.

| Sample Name | Fusion Gene Direction | Type      | Fusion Strand | Encompassing Read Pairs | Total Split Reads | Exon Boundary Fusion | 5' Gene Information                                     | 3' Gene Information                                |
|-------------|-----------------------|-----------|---------------|-------------------------|-------------------|----------------------|---------------------------------------------------------|----------------------------------------------------|
| Lu-0005     | HIPK2->TSPAN12        | intra-chr | -             | 51                      | 17                | YES                  | E1:chr7:HIPK2:NM_022740:139477403:139477693:-           | E8:chr7:TSPAN12:NM_012338:120427373:120428951:-    |
|             | SND1->BRAF            | intra-chr | +             | 29                      | 4                 | YES                  | E9:chr7:SND1:NM_014390:127347610:127347701:+            | E2:chr7:BRAF:NM_004333:140549910:140550012:-       |
| Lu-0124     | CDKL2->TBC1D1         | intra-chr | -             | 22                      | 13                | YES                  | E10:chr4:CDKL2:NM_003948:76521430:76521524:-            | E20:chr4:TBC1D1:NM_001253912:38134704:38134878:+   |
|             | DNAJC24->ELP4         | intra-chr | +             | 18                      | 9                 | YES                  | E2:chr11:DNAJC24:NM_181706:31392262:31392406:+          | E4:chr11:ELP4:NM_019040:31616316:31616448:+        |
|             | FAM190A->WDFY3        | intra-chr | +             | 6                       | 6                 | YES                  | E1:chr4:FAM190A:NM_001145065:91048683:91048982:+        | E5:chr4:WDFY3:NM_014991:85771054:85771178:-        |
|             | FLJ43663->WDR91       | intra-chr | -             | 41                      | 20                | YES                  | E1:chr7:FLJ43663:NR_015431:130792478:130793562:-        | E7:chr7:WDR91:NM_014149:134882744:134882903:-      |
|             | LOC100131691->OTC     | inter-chr | +             | 20                      | 20                | YES                  | E1:chr19:LOC100131691:NR_027334:59070552:59070776:<br>+ | E5:chrX:OTC:NM_000531:38260527:38260681:+          |
|             | LOC730102->SEC16B     | intra-chr | -             | 5                       | 1                 | YES                  | E7:chr1:LOC730102:NR_037167:177995289:177995390:-       | E2:chr1:SEC16B:NM_033127:177936817:177937174:-     |
|             | LRRC28->TPST1         | inter-chr | +             | 9                       | 3                 | YES                  | E3:chr15:LRRC28:NM_144598:99816780:99816821:+           | E3:chr7:TPST1:NM_003596:65751497:65751696:+        |
|             | SMARCC2->CALCOCO2     | inter-chr | -             | 8                       | 4                 | YES                  | E7:chr12:SMARCC2:NM_139067:56577644:56577714:-          | E11:chr17:CALCOCO2:NM_005831:46937675:46937811:+   |
|             | TESC->FBXO21          | intra-chr | -             | 8                       | 5                 | YES                  | E1:chr12:TESC:NM_017899:117537029:117537251:-           | E5:chr12:FBXO21:NM_033624:117612455:117612602:-    |
|             | ZNF516->SYTL5         | inter-chr | -             | 6                       | 3                 | YES                  | E2:chr18:ZNF516:NM_014643:74174983:74175097:-           | E2:chrX:SYTL5:NM_138780:37892786:37893261:+        |
| Lu-0155     | NDE1->C16orf45        | intra-chr | +             | 57                      | 30                | YES                  | E5:chr16:NDE1:NM_001143979:15771657:15771806:+          | E2:chr16:C16orf45:NM_033201:15609161:15609285:+    |
|             | TFG->GPR128           | intra-chr | +             | 83                      | 25                | YES                  | E3:chr3:TFG:NM_001007565:100438818:100438902:+          | E2:chr3:GPR128:NM_032787:100348441:100348555:+     |
| Lu-0158     | LOC730102->SEC16B     | intra-chr | -             | 6                       | 2                 | YES                  | E7:chr1:LOC730102:NR_037167:177995289:177995390:-       | E2:chr1:SEC16B:NM_033127:177936817:177937174:-     |
| Lu-0465     | CNOT2->TSPAN8         | intra-chr | +             | 17                      | 7                 | YES                  | E2:chr12:CNOT2:NM_014515:70671911:70672054:+            | E2:chr12:TSPAN8:NM_004616:71551398:71551567:-      |
|             | FRS2->MDM1            | intra-chr | +             | 25                      | 5                 | YES                  | E1:chr12:FRS2:NM_006654:69864128:69864310:+             | E2:chr12:MDM1:NM_017440:68724886:68725001:-        |
|             | SSPN->TSPAN8          | intra-chr | +             | 54                      | 16                | YES                  | E1:chr12:SSPN:NM_001135823:26348268:26348464:+          | E2:chr12:TSPAN8:NM_004616:71551398:71551567:-      |
| Lu-0597     | LOC285629->ATP10B     | intra-chr | -             | 12                      | 2                 | YES                  | E2:chr5:LOC285629:NR_027111:160362996:160363116:-       | E2:chr5:ATP10B:NM_025153:160212565:160212810:-     |
| Lu-0847     | TSPAN9->NCAPD2        | intra-chr | +             | 23                      | 8                 | YES                  | E2:chr12:TSPAN9:NM_001168320:3310342:3310422:+          | E18:chr12:NCAPD2:NM_014865:6634748:6634882:+       |
| Lu-0891     | ATF7IP2->NUBP1        | intra-chr | +             | 12                      | 8                 | YES                  | E1:chr16:ATF7IP2:NM_001256160:10479911:10479979:+       | E10:chr16:NUBP1:NM_002484:10861805:10861889:+      |
|             | CDH3->TEPP            | intra-chr | +             | 7                       | 5                 | YES                  | E2:chr16:CDH3:NM_001793:68679538:68679653:+             | E3:chr16:TEPP:NM_199046:58018206:58018268:+        |
|             | CYP4B1->CYP4X1        | intra-chr | +             | 12                      | 9                 | YES                  | E8:chr1:CYP4B1:NM_001099772:47280745:47280936:+         | E2:chr1:CYP4X1:NM_178033:47495661:47495803:+       |
|             | EML4->BIRC6           | intra-chr | +             | 37                      | 9                 | YES                  | E5:chr2:EML4:NM_001145076:42491845:42491871:+           | E69:chr2:BIRC6:NM_016252:32822817:32823035:+       |
|             | FBXO11->ATAD2B        | intra-chr | -             | 14                      | 2                 | YES                  | E4:chr2:FBXO11:NM_001190274:48065997:48066142:-         | E20:chr2:ATAD2B:NM_001242338:24011381:24011517:-   |
| Lu-0918     | KRBOX1->FAM198A       | intra-chr | +             | 6                       | 1                 | YES                  | E4:chr3:KRBOX1:NM_001205272:42983449:42983563:+         | E3:chr3:FAM198A:NM_001129908:43095012:43095135:+   |
|             | LINC00189->BACH1      | intra-chr | +             | 52                      | 7                 | YES                  | E2:chr21:LINC00189:NR_027072:30566436:30566581:+        | E2:chr21:BACH1:NM_001186:30693541:30693835:+       |
|             | TAX1BP1->UTP6         | inter-chr | +             | 80                      | 47                | YES                  | E5:chr7:TAX1BP1:NM_001206901:27809294:27809453:+        | E3:chr17:UTP6:NM_018428:30221988:30222030:-        |
| Lu-0920     | NPC2->SYNDIG1L        | intra-chr | -             | 13                      | 1                 | YES                  | E4:chr14:NPC2:NM_006432:74947404:74947482:-             | E2:chr14:SYNDIG1L:NM_001105579:74876030:74876504:- |
|             | SHFM1->LOC100506136   | intra-chr | -             | 6                       | 6                 | YES                  | E2:chr7:SHFM1:NM_006304:96324109:96324203:-             | E5:chr7:LOC100506136:NR_038948:96250968:96251955   |

|              |                     |           |   |     |     |                                             |                                                         |                                                    |
|--------------|---------------------|-----------|---|-----|-----|---------------------------------------------|---------------------------------------------------------|----------------------------------------------------|
| Lu-1208      | CHD9->RLTPR         | intra-chr | + | 18  | 11  | YES                                         | E19:chr16:CHD9:NM_025134:53289511:53289691:+            | E33:chr16:RLTPR:NM_001013838:67689933:67689970:+   |
|              | FAM189A2->PARD6G    | inter-chr | + | 8   | 7   | YES                                         | E2:chr9:FAM189A2:NM_001127608:71951128:71951185:<br>+   | E2:chr18:PARD6G:NM_032510:77960592:77960815:-      |
|              | RASEF->HSD17B3      | intra-chr | - | 19  | 12  | YES                                         | E5:chr9:RASEF:NM_152573:85627348:85627426:-             | E3:chr9:HSD17B3:NM_000197:99017149:99017225:-      |
|              | TBC1D14->STX18      | intra-chr | + | 20  | 19  | YES                                         | E2:chr4:TBC1D14:NM_001113361:6925099:6925838:+          | E2:chr4:STX18:NM_016930:4473365:4473433:-          |
| Lu-1431      | CCT2->BRD9          | inter-chr | + | 41  | 27  | YES                                         | E10:chr12:CCT2:NM_006431:69987289:69987393:+            | E10:chr5:BRD9:NR_027633:879908:880004:-            |
|              | MPP6->TOMM7         | intra-chr | + | 7   | 2   | YES                                         | E6:chr7:MPP6:NM_016447:24690103:24690331:+              | E2:chr7:TOMM7:NM_019059:22857618:22857667:-        |
|              | NCOA2->ADAMTS2      | inter-chr | - | 11  | 2   | YES                                         | E1:chr8:NCOA2:NM_006540:71315934:71316020:-:-           | E4:chr5:ADAMTS2:NM_014244:178634513:178634716      |
| Lu-1566      | TPPP->TRIP13        | intra-chr | - | 6   | 4   | YES                                         | E1:chr5:TPPP:NM_007030:693392:693510:-                  | E2:chr5:TRIP13:NM_001166260:894901:895067:+        |
|              | C12orf23->SLC35F1   | inter-chr | + | 16  | 2   | YES                                         | E3:chr12:C12orf23:NM_152261:107360888:107360958:+       | E2:chr6:SLC35F1:NM_001029858:118475607:118475783:+ |
|              | EZR->ROS1           | intra-chr | - | 108 | 153 | YES                                         | E10:chr6:EZR:NM_001111077:159191795:159191926:-         | E34:chr6:ROS1:NM_002944:117645494:117645578:-      |
| Lu-1825      | ROS1->HIPK2         | inter-chr | - | 51  | 4   | YES                                         | E28:chr6:ROS1:NM_002944:117663562:117663707:-           | E5:chr7:HIPK2:NM_022740:139313698:139313785:-      |
|              | CLPTM1L->NSMCE2     | inter-chr | - | 17  | 18  | YES                                         | E2:chr5:CLPTM1L:NM_030782:1344465:1344566:-             | E6:chr8:NSMCE2:NM_173685:126369460:126369561:+     |
| Lu-1875      | RAP1B->LYZ          | intra-chr | + | 6   | 3   | YES                                         | E2:chr12:RAP1B:NM_015646:69042478:69042561:+            | E2:chr12:LYZ:NM_000239:69743887:69744052:+         |
|              | C14orf43->ACER3     | inter-chr | - | 6   | 8   | YES                                         | E3:chr14:C14orf43:NM_001043318:74203700:74204000:-      | E2:chr11:ACER3:NM_018367:76637600:76637711:+       |
|              | CRTC3->ZNF592       | intra-chr | + | 9   | 2   | YES                                         | E1:chr15:CRTC3:NM_001042574:91073197:91073435:+         | E2:chr15:ZNF592:NM_014630:85307937:85308046:+      |
| Lu-1908      | CYP4B1->CYP4X1      | intra-chr | + | 7   | 1   | YES                                         | E8:chr1:CYP4B1:NM_001099772:47280745:47280936:+         | E2:chr1:CYP4X1:NM_178033:47495661:47495803:+       |
|              | KDM2A->PPP6R3       | intra-chr | + | 32  | 24  | YES                                         | E2:chr11:KDM2A:NM_012308:66888704:66888829:+            | E5:chr11:PPP6R3:NM_018312:68312305:68312492:+      |
|              | LOC100506393->SARNP | intra-chr | + | 31  | 18  | YES                                         | E2:chr12:LOC100506393:NR_040098:20172565:20172630<br>:+ | E10:chr12:SARNP:NR_026723:56154334:56154424:-      |
|              | PPP6R3->SYVN1       | intra-chr | + | 22  | 13  | YES                                         | E3:chr11:PPP6R3:NM_018312:68286968:68287119:+           | E10:chr11:SYVN1:NM_172230:64898390:64898507:-      |
|              | TTC3->FAM69A        | inter-chr | + | 11  | 3   | YES                                         | E31:chr21:TTC3:NM_001001894:38534291:38534365:+         | E2:chr1:FAM69A:NM_001252273:93341852:93341987:-    |
| Lu-1908      | LOC730102->SEC16B   | intra-chr | - | 5   | 2   | YES                                         | E7:chr1:LOC730102:NR_037167:177995289:177995390:-       | E2:chr1:SEC16B:NM_033127:177936817:177937174:-     |
|              | NPC2->SYNDIG1L      | intra-chr | - | 11  | 3   | YES                                         | E4:chr14:NPC2:NM_006432:74947404:74947482:-             | E2:chr14:SYNDIG1L:NM_001105579:74876030:74876504:- |
|              | SGK196->HGSNAT      | intra-chr | + | 22  | 4   | YES                                         | E4:chr8:SGK196:NM_032237:42958670:42958973:+            | E6:chr8:HGSNAT:NM_152419:43024315:43024385:+       |
| Lu-1939      | MYO9B->FZR1         | intra-chr | + | 5   | 6   | YES                                         | E35:chr19:MYO9B:NM_001130065:17317921:17318053:+        | E2:chr19:FZR1:NM_016263:3522953:3523056:+          |
|              | PARP6->MYOM1        | inter-chr | - | 429 | 171 | YES                                         | E1:chr15:PARP6:NM_020214:72563363:72563628:-            | E34:chr18:MYOM1:NM_003803:3079176:3079340:-        |
|              | SH2D3A->ZNF562      | intra-chr | - | 5   | 5   | YES                                         | E1:chr19:SH2D3A:NM_005490:6767397:6767523:-             | E2:chr19:ZNF562:NM_017656:9771395:9771550:-        |
|              | TRIP12->AP1S3       | intra-chr | - | 22  | 17  | YES                                         | E33:chr2:TRIP12:NM_004238:230650472:230650571           | E2:chr2:AP1S3:NM_001039569:224642407:224642586:-:- |
| Lu-1942      | KPNB1->AP2B1        | intra-chr | + | 7   | 16  | YES                                         | E12:chr17:KPNB1:NM_002265:45748067:45748198:+           | E17:chr17:AP2B1:NM_001282:34009713:34009843:+      |
|              | LRIG3->MSRB3        | intra-chr | - | 15  | 2   | YES                                         | E15:chr12:LRIG3:NM_153377:59271181:59271634:-           | E5:chr12:MSRB3:NM_198080:65847507:65847605:+       |
|              | LRIG3->TMEM97       | inter-chr | - | 51  | 23  | YES                                         | E3:chr12:LRIG3:NM_153377:59307762:59307837:-            | E2:chr17:TMEM97:NM_014573:26652528:26652673:+      |
|              | MAML2->SESN3        | intra-chr | - | 7   | 4   | YES                                         | E1:chr11:MAML2:NM_032427:96074546:96076344:-            | E2:chr11:SESN3:NM_144665:94926620:94926686:-       |
|              | MGLL->SLC41A3       | intra-chr | - | 45  | 3   | YES                                         | E3:chr3:MGLL:NM_007283:127500631:127500738:-            | E2:chr3:SLC41A3:NM_017836:125786789:125787089:-    |
| MIB1->ZNF714 | inter-chr           | +         | 8 | 7   | YES | E4:chr18:MIB1:NM_020774:19353584:19353689:+ | E3:chr19:ZNF714:NM_182515:21280990:21281117:+           |                                                    |

|         |                     |           |   |     |    |     |                                                   |                                                  |
|---------|---------------------|-----------|---|-----|----|-----|---------------------------------------------------|--------------------------------------------------|
|         | MPRIP->RPH3AL       | intra-chr | + | 14  | 4  | YES | E1:chr17:MPRIP:NM_201274:16946073:16946285:+      | E7:chr17:RPH3AL:NM_006987:96901:97076:-          |
|         | NUP107->PRIM2       | inter-chr | + | 8   | 7  | YES | E27:chr12:NUP107:NM_020401:69135592:69135760:+    | E8:chr6:PRIM2:NM_000947:57372287:57372355:+      |
|         | SHFM1->LOC100506136 | intra-chr | - | 10  | 3  | YES | E2:chr7:SHFM1:NM_006304:96324109:96324203:-       | E4:chr7:LOC100506136:NR_038948:96275035:96275248 |
|         | TPX2->BCL2L1        | intra-chr | + | 13  | 5  | YES | E1:chr20:TPX2:NM_012112:30326903:30327424:+       | E3:chr20:BCL2L1:NM_138578:30252260:30253889:-    |
|         | USP15->MLIP         | inter-chr | + | 14  | 5  | YES | E4:chr12:USP15:NM_006313:62708570:62708697:+      | E2:chr6:MLIP:NM_138569:53986244:53986400:+       |
|         | ZMIZ1->KIAA1274     | intra-chr | + | 5   | 9  | YES | E4:chr10:ZMIZ1:NM_020338:80921809:80921890:+      | E2:chr10:KIAA1274:NM_014431:72285678:72285892:+  |
| Lu-1995 | EFCAB2->SMYD3       | intra-chr | + | 35  | 17 | YES | E1:chr1:EFCAB2:NR_026586:245133283:245133745:+    | E9:chr1:SMYD3:NM_022743:246027100:246027188:-    |
|         | EPSTI1->ENOX1       | intra-chr | - | 52  | 13 | YES | E8:chr13:EPSTI1:NM_033255:43491676:43491760:-     | E15:chr13:ENOX1:NM_017993:43810771:43810874:-    |
|         | KIF5B->RET          | intra-chr | - | 144 | 82 | YES | E15:chr10:KIF5B:NM_004521:32317355:32317499:-     | E12:chr10:RET:NM_020975:43612031:43612179:+      |
|         | KRBOX1->FAM198A     | intra-chr | + | 9   | 1  | YES | E4:chr3:KRBOX1:NM_001205272:42983449:42983563:+   | E2:chr3:FAM198A:NM_001129908:43073758:43075045:+ |
|         | LOC285629->ATP10B   | intra-chr | - | 9   | 3  | YES | E2:chr5:LOC285629:NR_027111:160362996:160363116:- | E2:chr5:ATP10B:NM_025153:160212565:160212810:-   |
|         | MPRIP->SPNS3        | intra-chr | + | 201 | 55 | YES | E3:chr17:MPRIP:NM_201274:16981324:16981390:+      | E9:chr17:SPNS3:NM_182538:4381866:4381932:+       |
|         | NCOR1->DRG2         | intra-chr | - | 21  | 4  | YES | E1:chr17:NCOR1:NM_006311:16118675:16118874:-      | E3:chr17:DRG2:NM_001388:18001583:18001673:+      |
| Lu-2045 | ACSS3->MGAT4C       | intra-chr | + | 16  | 5  | YES | E8:chr12:ACSS3:NM_024560:81568566:81568718:+      | E3:chr12:MGAT4C:NM_013244:86727842:86727905:-    |
|         | CTF1->CPPED1        | intra-chr | + | 6   | 3  | YES | E2:chr16:CTF1:NM_001330:30910735:30910854         | E2:chr16:CPPED1:NM_001099455:12875041:12875260:- |
|         | GMEB2->TERT         | inter-chr | - | 10  | 3  | YES | E2:chr20:GMEB2:NM_012384:62250619:62250807:-      | E4:chr5:TERT:NM_198253:1280272:1280453:-         |
|         | KRBOX1->FAM198A     | intra-chr | + | 5   | 1  | YES | E4:chr3:KRBOX1:NM_001205272:42983449:42983563:+   | E3:chr3:FAM198A:NM_001129908:43095012:43095135:+ |
|         | MEF2D->GOLPH3L      | intra-chr | - | 21  | 7  | YES | E1:chr1:MEF2D:NM_005920:156470277:156470529       | E3:chr1:GOLPH3L:NM_018178:150636107:150636239:-  |
|         | TPPP->BRD9          | intra-chr | - | 8   | 12 | YES | E1:chr5:TPPP:NM_007030:693392:693310:-            | E10:chr5:BRD9:NR_027633:879908:880004:-          |



Supplementary Table S4. Sequences of PCR primers and probes for fusion transcripts detection.

| <b>Fusion gene</b>       | <b>Forward</b>         | <b>Reverse</b>          | <b>TaqMan Probe</b>        |
|--------------------------|------------------------|-------------------------|----------------------------|
| <b><i>EZR-ROS1</i></b>   | AGCTCAGCCAACTCTTTGTCT  | AGAAAAGGAGAGAAACCGTGGA  |                            |
| <b><i>EML4-BIRC6</i></b> | CATCACCAGCTGAAAAGTCACA | GAGGATGAAGACAGAGGCAGT   |                            |
| <b><i>KIF5B-RET</i></b>  | GCGAGTATAGATGCTGAGCTTC | TGCTCTGCCTTTCAGATGGAA   |                            |
| <b><i>SND1-BRAF</i></b>  | GTGTGGACTGGTCGATTGCA   | GGTGTATTCTTCATAGGCCTCCA |                            |
| <b><i>SND1-BRAF</i></b>  | GCAGGCTGAGAATATGGAGAG  | GGCCTCTATATGTTCTGTGTC   | ACAAGCAGTTTGTTGCCAAGGTGTGG |

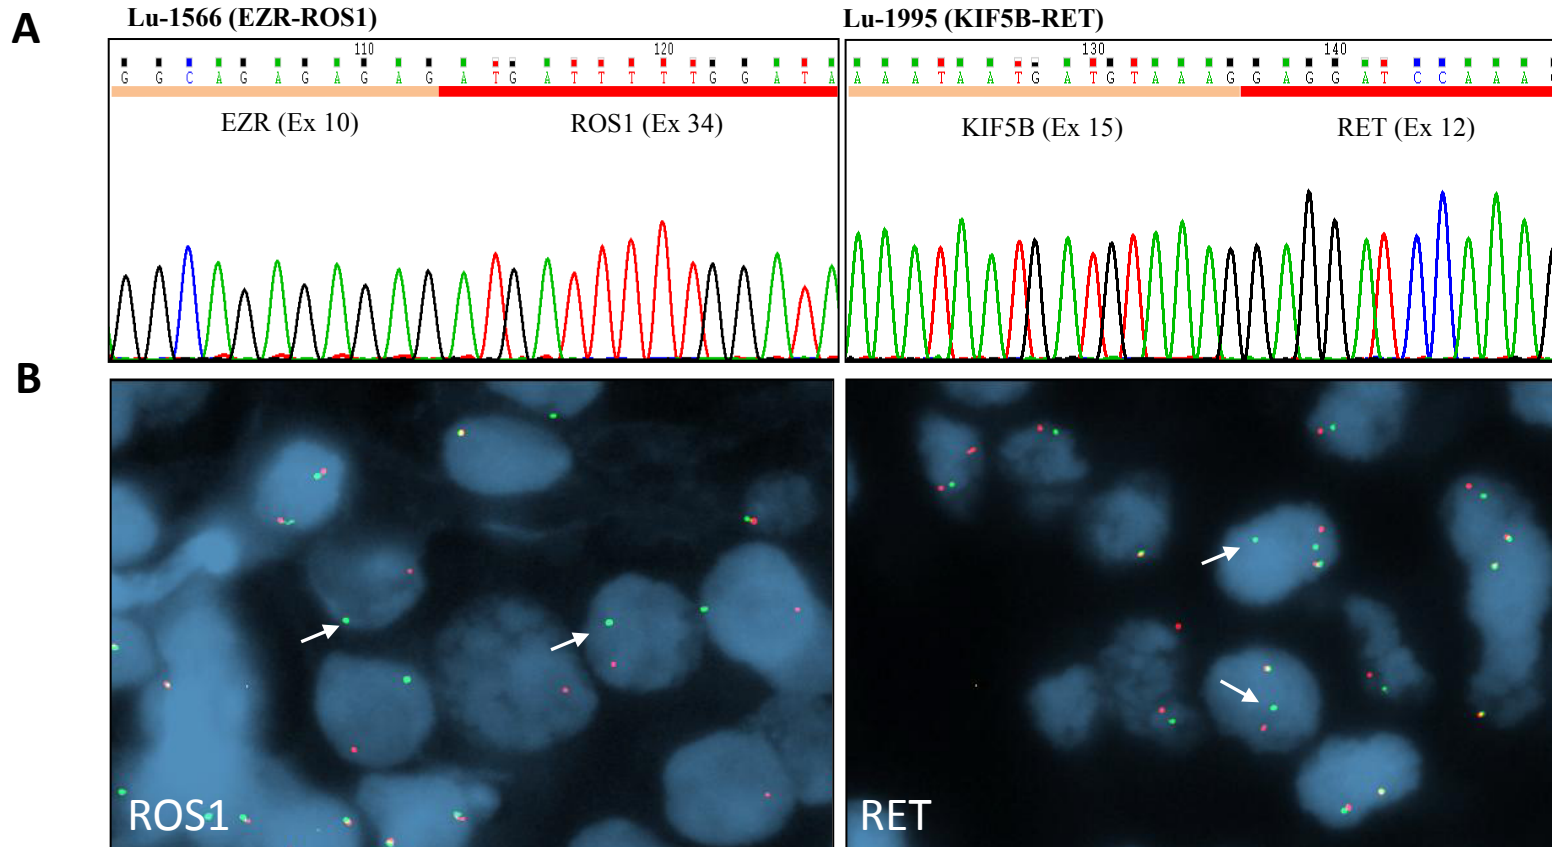

**Supplementary Figure S1.** Confirmation of fusion transcripts. A. Sanger sequencing traces of fusions involving *EZR* (orange)-*ROS1*(red) and *KIF5B*(orange)-*RET*(red) genes in the samples indicated. B. FISH validation of fusions using break-apart probes. Arrows indicate the break-apart probe adjacent to the *ROS1* or *RET* genes, respectively. Magnification x1000.

| Chromosome | 5' Gene | Position  | Location | Strand | 3' Gene | Position  | Location  | Strand | Type   | Genomic Fusion Gene |
|------------|---------|-----------|----------|--------|---------|-----------|-----------|--------|--------|---------------------|
| chr7       | SND1    | 127361983 | Intron10 | -      | BRAF    | 140572145 | Intron 01 | -      | fusion | SND1-BRAF           |
| chr7       | SND1    | 127453469 | Intron11 | -      | TBXAS1  | 139517148 | Intron 04 | -      | fusion | SND1-TBXAS1         |
| chr7       | SND1    | 127457072 | Intron11 | -      | TBXAS1  | 139511559 | Intron 04 | -      | fusion | SND1-TBXAS1         |
| chr7       | SND1    | 127457102 | Intron11 | -      | BRAF    | 140572118 | Intron 01 | -      | fusion | SND1-BRAF           |
| chr7       | TBXAS1  | 139705930 | Intron09 | +      | BRAF    | 140582144 | Intron 01 | +      | fusion | TBXAS1-BRAF         |

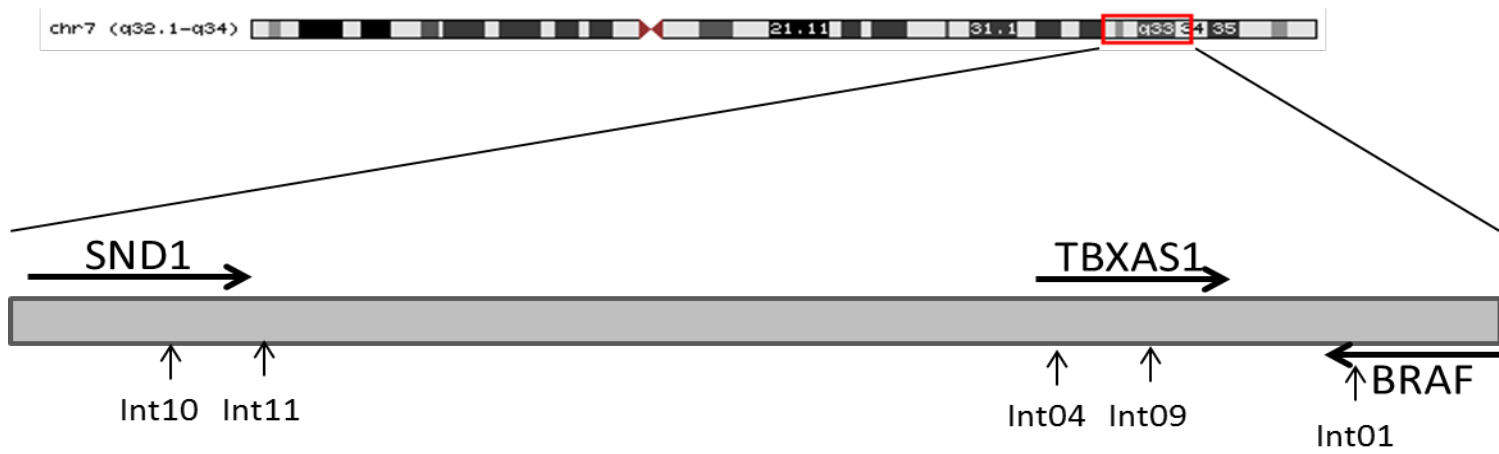

**Supplementary Figure S2.** Genomic rearrangements of the fusion region in Lu-5 based on whole genome sequencing. Int = intron.

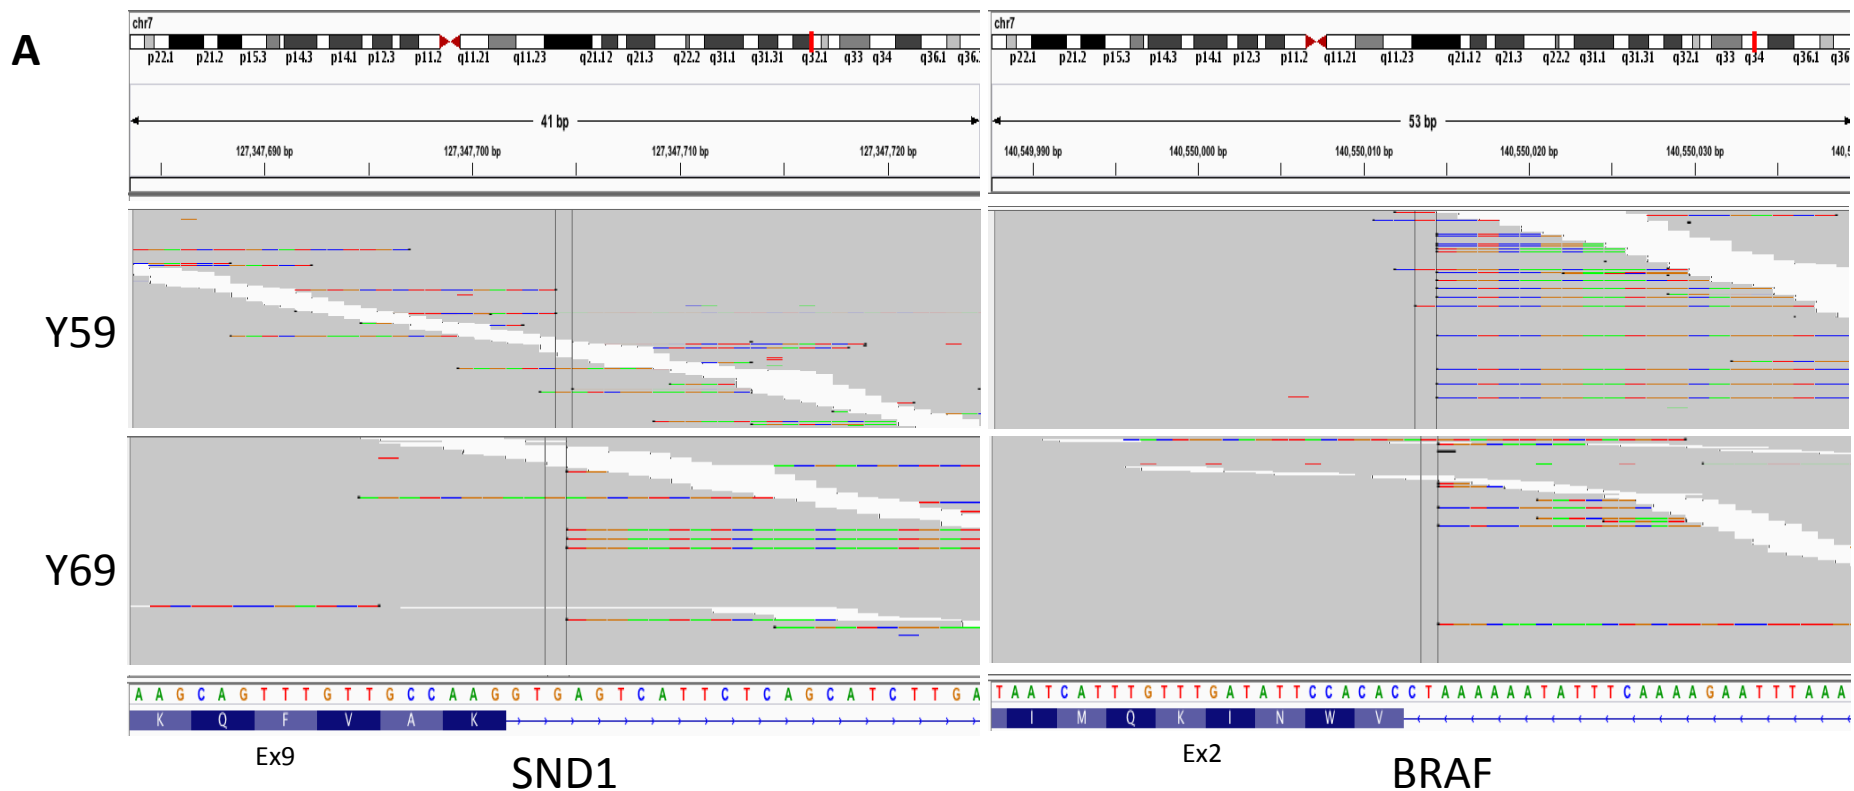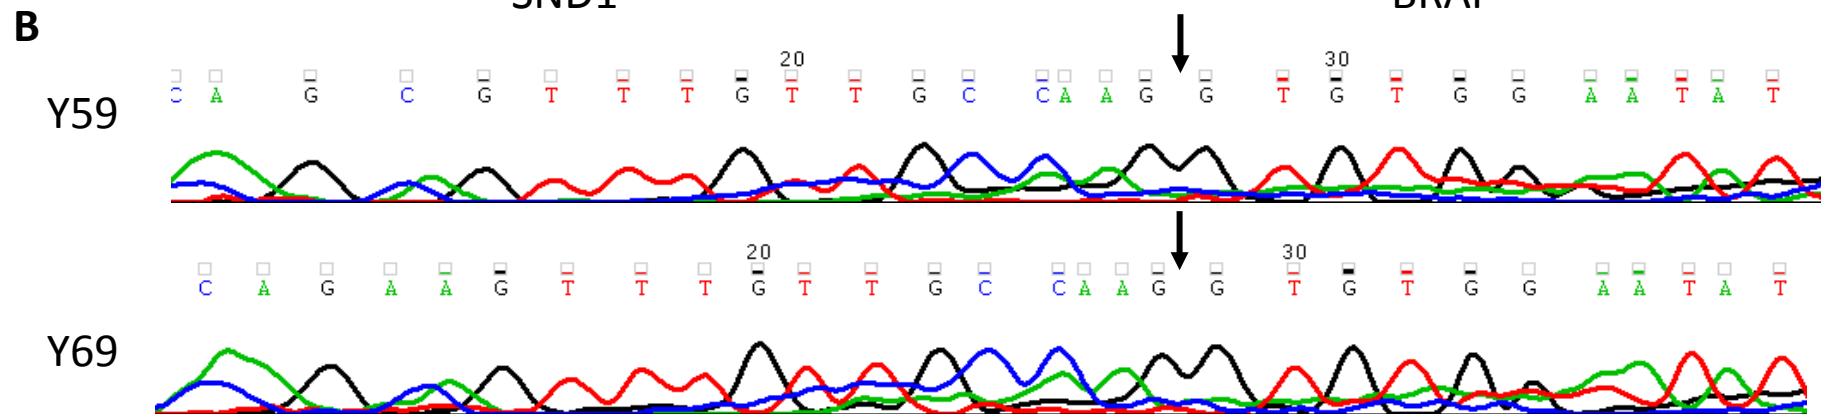

**Supplementary Figure S3. A**, The IGV screen shot of genomic rearrangements for the fusion region in Y59 and Y69 based on whole genome capture sequencing. The vertical lines indicated the break points. Perfectly matched reads are shown in gray. Colors represent mismatched bases soft-clipped around the break points. Both samples were broken and fused at intron 9 of *SND1* and intron 1 of *BRAF*. **B**, Sanger sequencing using cDNA from Y59 and Y69. *SND1*-*BRAF* fusion transcript was confirmed by qRT-PCR and sequenced at the fusion junction spanning exon 9 of *SND1* and exon 2 of *BRAF*. Arrow heads, fusion point.
